# Supplementary material
Source: PubMed Central journal article supplement (PMC5787864)
Supplement: ba011726-suppl1.pdf [file ba011726-suppl1.pdf]

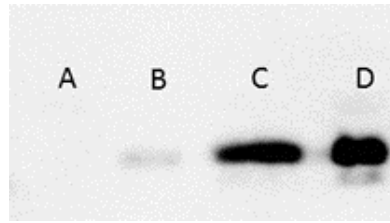

**Figure S1:** The western blot results of extracellular vesicles (EVs) from patient and control demonstrating the expression of hemopexin (A) washed patient's EV (B) washed matched control's EV (C) patient's EV after incubated with normal fresh plasma (D) EV of the donor of fresh plasma
